# Supplementary material for: Weight Loss Trajectories in Healthy Weight Coaching: Cohort Study
Source: PubMed Central journal article supplement (PMC8943569; doi:10.2196/26374), 2022-03-09
Supplement: formative_v6i3e26374_app1.pdf [file formative_v6i3e26374_app1.pdf]

# Weight Loss Trajectories in Healthy Weight Coaching: Cohort Study

Sakris Kupila, BM<sup>1\*</sup>; Mikko S Venäläinen, PhD<sup>2\*</sup>; Laura U Suojanen, MSc<sup>3</sup>; Milla Rosengård-Bärlund, MD, PhD<sup>3</sup>; Aila J Ahola, PhD<sup>1,3,4,5</sup>; Laura L Elo, PhD<sup>2</sup>; Kirsi H Pietiläinen, MD, PhD<sup>1,3</sup>

<sup>1</sup>Obesity Research Unit, Research Program for Clinical and Molecular Metabolism, Faculty of Medicine, University of Helsinki, Finland

<sup>2</sup>Turku Bioscience Centre, University of Turku and Åbo Akademi University, Finland

<sup>3</sup>Abdominal Center, Obesity Center, Endocrinology, University of Helsinki and Helsinki University Central Hospital, Helsinki, Finland

<sup>4</sup>Department of Nephrology, University of Helsinki and Helsinki University Hospital, Helsinki, Finland

<sup>5</sup>Folkhälsan Institute of Genetics, Folkhälsan Research Center, Helsinki, Finland

\* These authors contributed equally to this work

**Corresponding author:** Kirsi Pietiläinen, Obesity Research Unit, Biomedicum 1, Haartmaninkatu 8, P.O. Box 63, FI-00014 University of Helsinki, Finland. Telephone +358-505992295. E-mail: kirsi.pietilainen@helsinki.fi

**Table S1.** Distribution of the 1189 study participants across different time points in the 12-month program at the time of data analysis

| <b>Month</b> | <b>N</b>    |
|--------------|-------------|
| 0            | 102         |
| 1            | 125         |
| 2            | 123         |
| 3            | 86          |
| 4            | 100         |
| 5            | 91          |
| 6            | 67          |
| 7            | 57          |
| 8            | 79          |
| 9            | 55          |
| 10           | 45          |
| 11           | 86          |
| 12           | 173         |
| <b>Total</b> | <b>1189</b> |

**Table S2.** Prevalence of diseases at baseline

| <b>Disease</b>                        | <b>N</b> | <b>Proportion of the study population (%)</b> |
|---------------------------------------|----------|-----------------------------------------------|
| no disease                            | 145      | 12.2                                          |
| hypertension                          | 598      | 57.2                                          |
| allergies                             | 368      | 35.2                                          |
| dyslipidaemia                         | 368      | 35.2                                          |
| sleep apnoea                          | 358      | 34.2                                          |
| depression                            | 343      | 32.8                                          |
| osteoarthritis or osteoarthritis      | 318      | 30.4                                          |
| headache                              | 265      | 25.3                                          |
| asthma                                | 258      | 24.7                                          |
| prediabetes                           | 253      | 24.2                                          |
| anxiety                               | 204      | 19.5                                          |
| type 2 diabetes                       | 193      | 18.5                                          |
| hypothyreosis                         | 189      | 18.1                                          |
| fatty liver                           | 155      | 14.8                                          |
| gallstones                            | 136      | 13.0                                          |
| heart arrhythmia                      | 125      | 12.0                                          |
| chronic back pain                     | 116      | 11.1                                          |
| surgery within the past year          | 97       | 9.3                                           |
| other mental illness                  | 85       | 8.1                                           |
| binge eating disorder                 | 75       | 7.2                                           |
| diaphragmatic hernia                  | 66       | 6.3                                           |
| anaemia                               | 64       | 6.1                                           |
| gastroesophageal reflux disease       | 60       | 5.7                                           |
| cancer                                | 51       | 4.9                                           |
| gout                                  | 47       | 4.5                                           |
| other lung disease                    | 25       | 2.4                                           |
| other vascular disease                | 24       | 2.3                                           |
| alcoholism                            | 22       | 2.1                                           |
| rheumatoid arthritis                  | 21       | 2.0                                           |
| inflammatory bowel disease            | 19       | 1.8                                           |
| deep vein thrombosis                  | 18       | 1.7                                           |
| hyperthyreosis                        | 17       | 1.6                                           |
| coronary artery disease               | 17       | 1.6                                           |
| peripheral artery disease             | 16       | 1.5                                           |
| chronic obstructive pulmonary disease | 14       | 1.3                                           |
| ischemic stroke                       | 11       | 1.1                                           |
| myocardial infarction                 | 11       | 1.1                                           |
| valvular heart disease                | 9        | 0.9                                           |
| cerebrovascular disease               | 8        | 0.8                                           |
| anorexia                              | 7        | 0.7                                           |
| haemorrhagic stroke                   | 2        | 0.2                                           |
| memory disorder                       | 1        | 0.1                                           |

**Table S3.** Prevalence of medication types at baseline

| <b>Medication type</b>               | <b>N</b> | <b>Proportion of the study population (%)</b> |
|--------------------------------------|----------|-----------------------------------------------|
| no medication                        | 189      | 15.9                                          |
| cardiovascular                       | 513      | 43.1                                          |
| dietary supplements                  | 434      | 36.5                                          |
| metabolic and endocrine              | 349      | 29.4                                          |
| acute pain                           | 348      | 29.3                                          |
| psychopharmacological                | 284      | 23.9                                          |
| allergy                              | 203      | 17.1                                          |
| respiratory                          | 190      | 16.0                                          |
| gastrointestinal                     | 171      | 14.4                                          |
| sex hormones                         | 123      | 10.3                                          |
| sleep                                | 91       | 7.7                                           |
| neurological                         | 88       | 7.4                                           |
| other                                | 75       | 6.3                                           |
| corticosteroids and immunomodulators | 54       | 4.5                                           |
| chronic pain                         | 32       | 2.7                                           |
| urological                           | 10       | 0.8                                           |
| antimicrobial                        | 1        | 0.1                                           |

**Table S4.** Prevalence of medication types at 12 months

| Medication type                      | 0 months |    | 12 months |        | P value |
|--------------------------------------|----------|----|-----------|--------|---------|
|                                      | Yes      | N  | Yes (%)   | No (%) |         |
| cardiovascular                       | Yes      | 44 | 79.5      | 20.5   | 0.146   |
|                                      | No       | 52 | 5.8       | 94.2   |         |
| dietary supplements                  | Yes      | 46 | 58.7      | 41.3   | 0.736   |
|                                      | No       | 50 | 32.0      | 68.0   |         |
| metabolic and endocrine              | Yes      | 30 | 66.7      | 33.3   | 0.454   |
|                                      | No       | 66 | 9.1       | 90.9   |         |
| acute pain                           | Yes      | 9  | 77.8      | 22.2   | 0.002   |
|                                      | No       | 87 | 17.2      | 82.8   |         |
| psychopharmacological                | Yes      | 14 | 85.7      | 14.3   | 0.109   |
|                                      | No       | 82 | 9.8       | 90.2   |         |
| allergy                              | Yes      | 20 | 70.0      | 30.0   | 1.000   |
|                                      | No       | 76 | 9.2       | 90.8   |         |
| respiratory                          | Yes      | 17 | 52.9      | 47.1   | 0.039   |
|                                      | No       | 79 | 1.3       | 97.8   |         |
| gastrointestinal                     | Yes      | 16 | 62.5      | 37.5   | 1.000   |
|                                      | No       | 80 | 7.5       | 92.5   |         |
| sex hormones                         | Yes      | 10 | 20.0      | 80.0   | 0.503   |
|                                      | No       | 86 | 14.0      | 86.0   |         |
| sleep                                | Yes      | 12 | 33.3      | 66.7   | 0.791   |
|                                      | No       | 84 | 7.1       | 92.9   |         |
| neurological                         | Yes      | 4  | 75.0      | 25.0   | 1.000   |
|                                      | No       | 92 | 1.1       | 98.9   |         |
| corticosteroids and immunomodulators | Yes      | 3  | 0         | 100    | 0.727   |
|                                      | No       | 93 | 5.4       | 94.6   |         |
| chronic pain                         | Yes      | 3  | 0         | 100    | NA      |
|                                      | No       | 93 | 0         | 100    |         |
| urological                           | Yes      | 1  | 0         | 100    | 1.000   |
|                                      | No       | 95 | 2.1       | 97.9   |         |
| antimicrobial                        | Yes      | 0  | 0         | 0      | NA      |
|                                      | No       | 96 | 0         | 100    |         |
| other                                | Yes      | 6  | 16.7      | 83.3   | 0.143   |
|                                      | No       | 90 | 13.3      | 86.7   |         |

The column "0 months" shows how many of the participants reaching 12 months reported using each medication type at baseline (yes = reports using said medication type). The column "12 months" shows the percentage of those participants using the same medication type at 12 months. McNemar test.

**Table S5.** Mean relative (%), standard error (SE), interquartile range (IQR)) and absolute (kg) weight changes at 3, 6, 9, and 12 months

| Month | N   | Weight change (%) |              | Weight change (kg) |              |
|-------|-----|-------------------|--------------|--------------------|--------------|
|       |     | Mean (SE)         | Median (IQR) | Mean (SE)          | Median (IQR) |
| 3     | 839 | -2.1 (0.1)        | -1.6 (3.7)   | -2.5 (0.1)         | -1.8 (4.2)   |
| 6     | 563 | -3.1 (0.2)        | -2.4 (5.5)   | -3.7 (0.3)         | -2.9 (6.0)   |
| 9     | 359 | -3.2 (0.3)        | -2.6 (6.9)   | -3.8 (0.4)         | -2.9 (7.1)   |
| 12    | 173 | -4.6 (0.5)        | -4.0 (7.8)   | -5.6 (0.7)         | -4.1 (7.9)   |

**Table S6.** Mean 12-month weight loss (% from baseline) by sex, age, type 2 diabetes status, baseline body mass index and weight entry rate

|                                      |       |     | Relative weight change at 3 months (%)  |     |        |     |         |
|--------------------------------------|-------|-----|-----------------------------------------|-----|--------|-----|---------|
| Variable                             |       | N   | Mean                                    | SE  | Median | IQR | P value |
| Sex                                  | Women | 704 | -2.1                                    | 0.1 | -1.7   | 3.6 | 0.633   |
|                                      | Men   | 135 | -2.1                                    | 0.3 | -1.4   | 4.4 |         |
| Age (years)                          | <40   | 195 | -1.8                                    | 0.2 | -1.4   | 3.3 | 0.135   |
|                                      | ≥40   | 644 | -2.1                                    | 0.1 | -1.7   | 3.7 |         |
| Type 2 diabetes                      | No    | 645 | -2.1                                    | 0.1 | -1.7   | 3.7 | 0.763   |
|                                      | Yes   | 139 | -2.0                                    | 0.2 | -1.7   | 3.6 |         |
| Body mass index (kg/m <sup>2</sup> ) | <40   | 453 | -1.8                                    | 0.1 | -1.5   | 3.4 | 0.019   |
|                                      | ≥40   | 386 | -2.4                                    | 0.2 | -1.8   | 3.7 |         |
| Weight entry rate (entries/month)    | <4    | 653 | -1.8                                    | 0.1 | -1.4   | 3.3 | <0.001  |
|                                      | ≥4    | 186 | -3.0                                    | 0.3 | -2.6   | 4.0 |         |
|                                      |       |     | Relative weight change at 6 months (%)  |     |        |     |         |
| Variable                             |       | N   | Mean                                    | SE  | Median | IQR | P value |
| Sex                                  | Women | 480 | -3.0                                    | 0.2 | -2.4   | 5.4 | 0.340   |
|                                      | Men   | 83  | -3.7                                    | 0.6 | -2.9   | 5.7 |         |
| Age (years)                          | <40   | 123 | -2.4                                    | 0.4 | -1.8   | 4.6 | 0.082   |
|                                      | ≥40   | 440 | -3.3                                    | 0.2 | -2.7   | 5.7 |         |
| Type 2 diabetes                      | No    | 437 | -3.0                                    | 0.2 | -2.4   | 5.2 | 0.731   |
|                                      | Yes   | 89  | -2.8                                    | 0.5 | -2.2   | 4.9 |         |
| Body mass index (kg/m <sup>2</sup> ) | <40   | 301 | -2.5                                    | 0.2 | -2.4   | 5.5 | 0.055   |
|                                      | ≥40   | 262 | -3.7                                    | 0.3 | -2.5   | 5.3 |         |
| Weight entry rate (entries/month)    | <4    | 441 | -2.5                                    | 0.2 | -2.2   | 5.1 | <0.001  |
|                                      | ≥4    | 122 | -5.1                                    | 0.5 | -4.2   | 6.2 |         |
|                                      |       |     | Relative weight change at 9 months (%)  |     |        |     |         |
| Variable                             |       | N   | Mean                                    | SE  | Median | IQR | P value |
| Sex                                  | Women | 307 | -3.1                                    | 0.3 | -2.6   | 6.7 | 0.460   |
|                                      | Men   | 52  | -4.2                                    | 0.8 | -2.7   | 7.1 |         |
| Age (years)                          | <40   | 69  | -1.8                                    | 0.6 | -1.2   | 7.0 | 0.028   |
|                                      | ≥40   | 290 | -3.6                                    | 0.3 | -2.9   | 6.5 |         |
| Type 2 diabetes                      | No    | 280 | -3.0                                    | 0.3 | -2.5   | 6.5 | 0.475   |
|                                      | Yes   | 60  | -3.9                                    | 0.7 | -2.9   | 7.6 |         |
| Body mass index (kg/m <sup>2</sup> ) | <40   | 204 | -2.5                                    | 0.3 | -2.3   | 7.1 | 0.121   |
|                                      | ≥40   | 155 | -4.2                                    | 0.5 | -2.8   | 6.2 |         |
| Weight entry rate (entries/month)    | <4    | 280 | -2.8                                    | 0.3 | -2.1   | 6.4 | <0.001  |
|                                      | ≥4    | 79  | -4.9                                    | 0.6 | -4.5   | 6.8 |         |
|                                      |       |     | Relative weight change at 12 months (%) |     |        |     |         |
| Variable                             |       | N   | Mean                                    | SE  | Median | IQR | P value |
| Sex                                  | Women | 144 | -4.5                                    | 0.6 | -4.1   | 7.5 | 0.721   |
|                                      | Men   | 29  | -5.4                                    | 1.4 | -3.6   | 8.9 |         |
| Age (years)                          | <40   | 26  | -4.3                                    | 1.2 | -4.4   | 7.7 | 0.956   |
|                                      | ≥40   | 147 | -4.7                                    | 0.6 | -4.0   | 7.7 |         |
| Type 2 diabetes                      | No    | 140 | -4.2                                    | 0.6 | -3.6   | 7.5 | 0.446   |
|                                      | Yes   | 26  | -5.3                                    | 1.2 | -4.5   | 9.0 |         |
| Body mass index (kg/m <sup>2</sup> ) | <40   | 101 | -3.2                                    | 0.5 | -2.8   | 7.7 | 0.016   |
|                                      | ≥40   | 72  | -6.6                                    | 0.9 | -5.2   | 7.6 |         |
| Weight entry rate (entries/month)    | <4    | 135 | -4.2                                    | 0.6 | -3.1   | 7.4 | 0.091   |
|                                      | ≥4    | 38  | -5.9                                    | 1.1 | -4.9   | 6.1 |         |

**Table S7.** Mean weight changes (% from baseline) in the weight loss clusters

| Cluster<br>(baseline N) | 3 Months |               |                 | 6 Months |                |                 | 9 Months |                |                 | 12 Months |                |                 |
|-------------------------|----------|---------------|-----------------|----------|----------------|-----------------|----------|----------------|-----------------|-----------|----------------|-----------------|
|                         | N        | Mean<br>(SE)  | Median<br>(IQR) | N        | Mean<br>(SE)   | Median<br>(IQR) | N        | Mean<br>(SE)   | Median<br>(IQR) | N         | Mean<br>(SE)   | Median<br>(IQR) |
| 1 (93)                  | 91       | -6.3<br>(0.4) | -6.1<br>(5.2)   | 79       | -10.3<br>(0.6) | -9.8<br>(7.0)   | 49       | -12.7<br>(0.9) | -10.7<br>(7.3)  | 28        | -15.7<br>(1.3) | -13.1<br>(7.2)  |
| 2 (208)                 | 188      | -4.2<br>(0.2) | -4.0<br>(2.8)   | 148      | -5.4<br>(0.2)  | -5.4<br>(3.0)   | 99       | -5.9<br>(0.2)  | -5.8<br>(1.9)   | 55        | -6.1<br>(0.3)  | -6.6<br>(2.7)   |
| 3 (332)                 | 242      | -1.9<br>(0.1) | -1.9<br>(1.8)   | 136      | -2.2<br>(0.1)  | -2.3<br>(1.7)   | 80       | -2.2<br>(0.2)  | -2.3<br>(1.5)   | 32        | -3.4<br>(0.3)  | -3.1<br>(1.9)   |
| 4 (384)                 | 173      | -0.8<br>(0.1) | -0.4<br>(1.3)   | 107      | -0.4<br>(0.1)  | -0.2<br>(1.8)   | 67       | 0.2<br>(0.2)   | 0.0<br>(1.6)    | 33        | -0.1<br>(0.2)  | 0.0<br>(0.6)    |
| 5 (172)                 | 145      | 1.4<br>(0.1)  | 1.4<br>(2.2)    | 93       | 2.5<br>(0.2)   | 1.9<br>(2.4)    | 64       | 3.2<br>(0.3)   | 2.1<br>(3.1)    | 25        | 3.5<br>(0.6)   | 2.2<br>(1.5)    |

SE, standard error; IQR, interquartile range. Individual weight loss patterns were clustered based on dynamic time-warping distance and agglomerative hierarchical clustering. We identified five clusters based on weight loss success. Cluster 1, super-responders; cluster 2, responders; cluster 3, moderate responders; cluster 4, non-responders; cluster 5, gainers.



**Table S8.** Age, sex, body mass index, and weight entry rate in the weight loss clusters

| Cluster (N) | Age (years) |              | Sex       |         | BMI (kg/m <sup>2</sup> ) |              | Weight entries per month |              |
|-------------|-------------|--------------|-----------|---------|--------------------------|--------------|--------------------------|--------------|
|             | Mean (SE)   | Median (IQR) | Women (%) | Men (%) | Mean (SE)                | Median (IQR) | Mean (SE)                | Median (IQR) |
| 1 (93)      | 50.5 (1.2)  | 52.0 (16.0)  | 79.6      | 20.4    | 43.2 (0.9)               | 42.3 (10.4)  | 3.5 (0.2)                | 3.3 (2.2)    |
| 2 (208)     | 49.5 (0.8)  | 51.0 (16.3)  | 85.1      | 14.9    | 40.5 (0.5)               | 39.5 (8.7)   | 3.3 (0.1)                | 3.1 (1.9)    |
| 3 (332)     | 48.4 (0.6)  | 50.0 (18.0)  | 82.5      | 17.5    | 40.7 (0.4)               | 39.7 (8.3)   | 3.2 (0.1)                | 2.8 (2.3)    |
| 4 (384)     | 48.0 (0.6)  | 49.0 (18.0)  | 79.2      | 20.8    | 40.8 (0.4)               | 39.5 (7.8)   | 3.2 (0.1)                | 2.8 (2.2)    |
| 5 (172)     | 48.2 (0.9)  | 50.0 (16.0)  | 77.9      | 22.1    | 38.6 (0.5)               | 37.9 (7.4)   | 2.9 (0.2)                | 2.6 (1.8)    |
| <i>P</i>    | 0.302       |              | 0.308     |         | <0.001                   |              | 0.004                    |              |

BMI, body mass index; SE, standard error; IQR, interquartile range. Kruskal-Wallis test for continuous variables, Chi-squared test for categorical variables.

**Table S9.** Number of diseases and medications in the weight loss clusters

| Characteristic              | Cluster 1 (N=93) |              | Cluster 2 (N=208) |              | Cluster 3 (N=332) |              | Cluster 4 (N=384) |              | Cluster 5 (N=172) |              | <i>P</i> |
|-----------------------------|------------------|--------------|-------------------|--------------|-------------------|--------------|-------------------|--------------|-------------------|--------------|----------|
|                             | Mean (SE)        | Median (IQR) | Mean (SE)         | Median (IQR) | Mean (SE)         | Median (IQR) | Mean (SE)         | Median (IQR) | Mean (SE)         | Median (IQR) |          |
| Number of diseases          | 4.9 (0.3)        | 4.0 (3.0)    | 4.7 (0.2)         | 4.0 (4.8)    | 4.8 (0.2)         | 4.0 (3.0)    | 4.9 (0.1)         | 5.0 (3.0)    | 4.8 (0.2)         | 5.0 (3.0)    | 0.796    |
| Number of disease groups    | 4.0 (0.2)        | 4.0 (2.0)    | 3.9 (0.1)         | 4.0 (3.0)    | 3.8 (0.1)         | 4.0 (3.0)    | 3.8 (0.1)         | 4.0 (2.0)    | 3.7 (0.2)         | 3.0 (3.0)    | 0.561    |
| Number of medications       | 3.4 (0.3)        | 3.0 (4.0)    | 3.4 (0.2)         | 3.0 (3.0)    | 3.3 (0.1)         | 3.0 (4.0)    | 3.0 (0.1)         | 3.0 (3.0)    | 3.5 (0.2)         | 3.0 (3.0)    | 0.048    |
| Number of medication groups | 2.5 (0.2)        | 3.0 (3.0)    | 2.6 (0.1)         | 2.0 (3.0)    | 2.5 (0.1)         | 2.0 (2.0)    | 2.3 (0.1)         | 2.0 (3.0)    | 2.7 (0.1)         | 2.5 (2.0)    | 0.100    |

SE, standard error; IQR, interquartile range. Kruskal-Wallis test.

**Table S10.** Comparison of those continuing the study to those dropping out based on baseline body mass index, age, monthly weight entry rate, and sex

| Characteristic                       | Continuers (N=843) |              | Dropouts (N=346) |              | P value |
|--------------------------------------|--------------------|--------------|------------------|--------------|---------|
|                                      | Mean (SE)          | Median (IQR) | Mean (SE)        | Median (IQR) |         |
| Body mass index (kg/m <sup>2</sup> ) | 40.4 (0.2)         | 39.4 (8.1)   | 41.0 (0.4)       | 40.1 (8.6)   | 0.120   |
| Age (years)                          | 49.2 (0.4)         | 51.0 (17.0)  | 47.2 (0.6)       | 49.0 (18.0)  | 0.011   |
| Monthly weight entry rate            | 3.3 (0.1)          | 3.0 (2.2)    | 3.0 (0.1)        | 2.5 (2.2)    | <0.001  |
|                                      | N                  | %            | N                | %            |         |
| Women                                | 691                | 82.0         | 272              | 78.6         | 0.208   |
| Men                                  | 152                | 18.0         | 74               | 21.4         |         |

SE, standard error; IQR, interquartile range. Mann-Whitney U-test for continuous variables, Chi-squared test for categorical variables.

**Figure S1.** Individual weight changes (% from baseline) at the 3, 6, 9, and 12-month time points

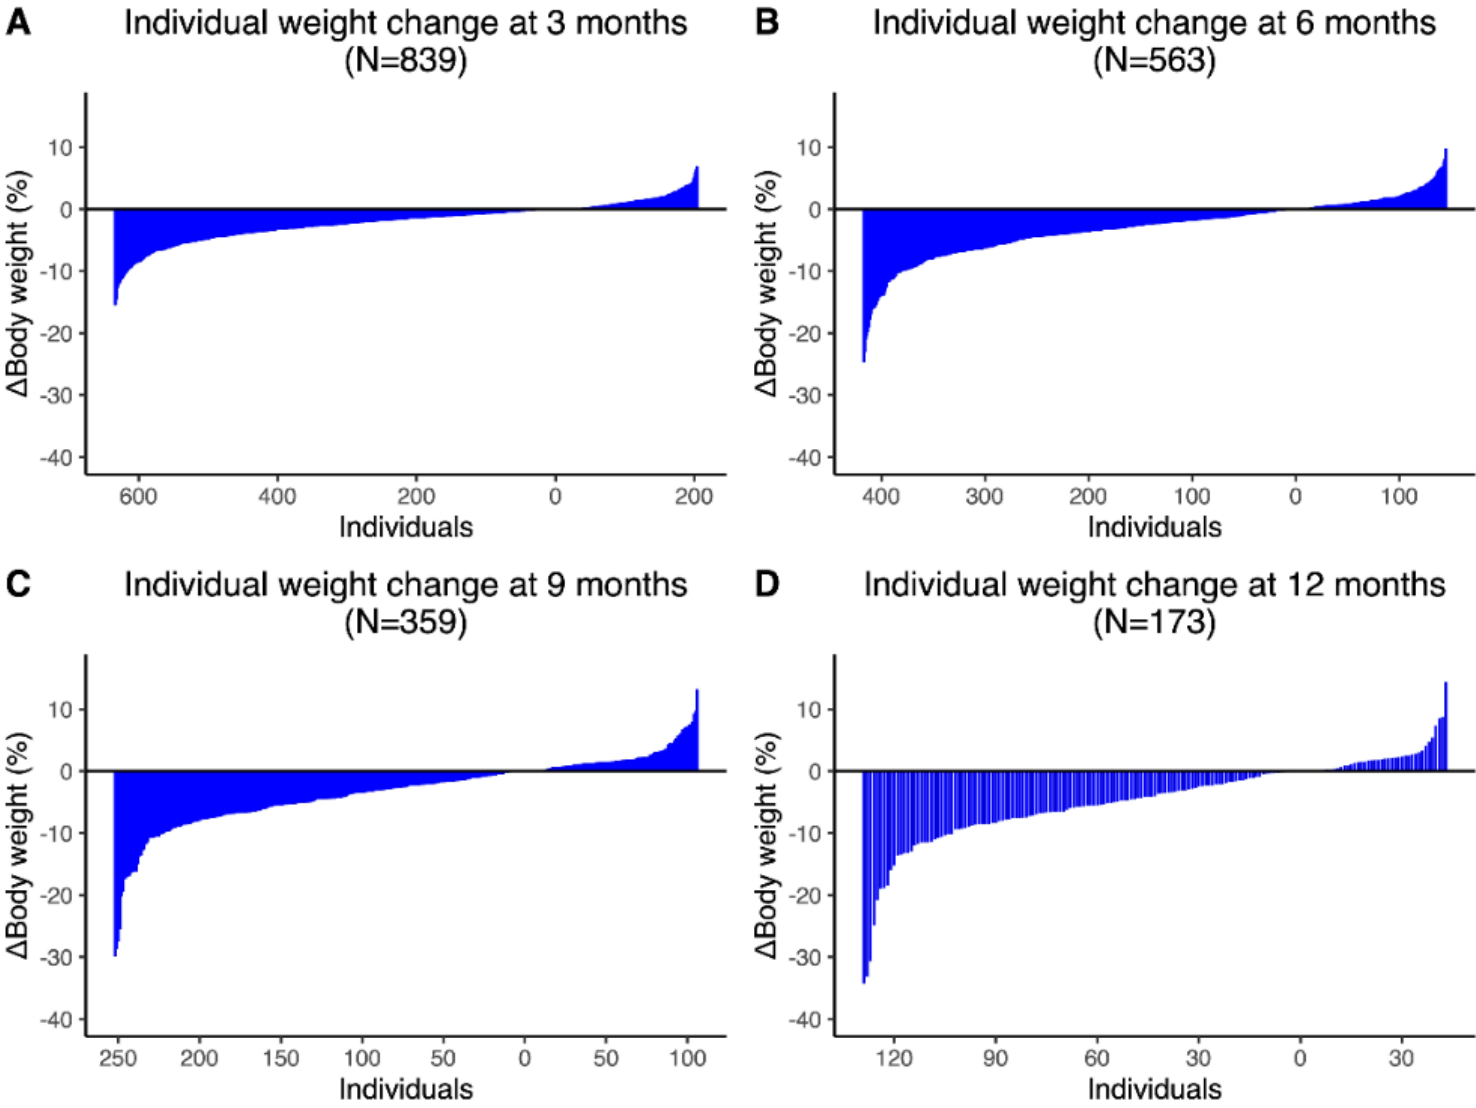

**Figure S2.** A) Disease groups among the weight loss clusters. B) Medication groups among the weight loss clusters.

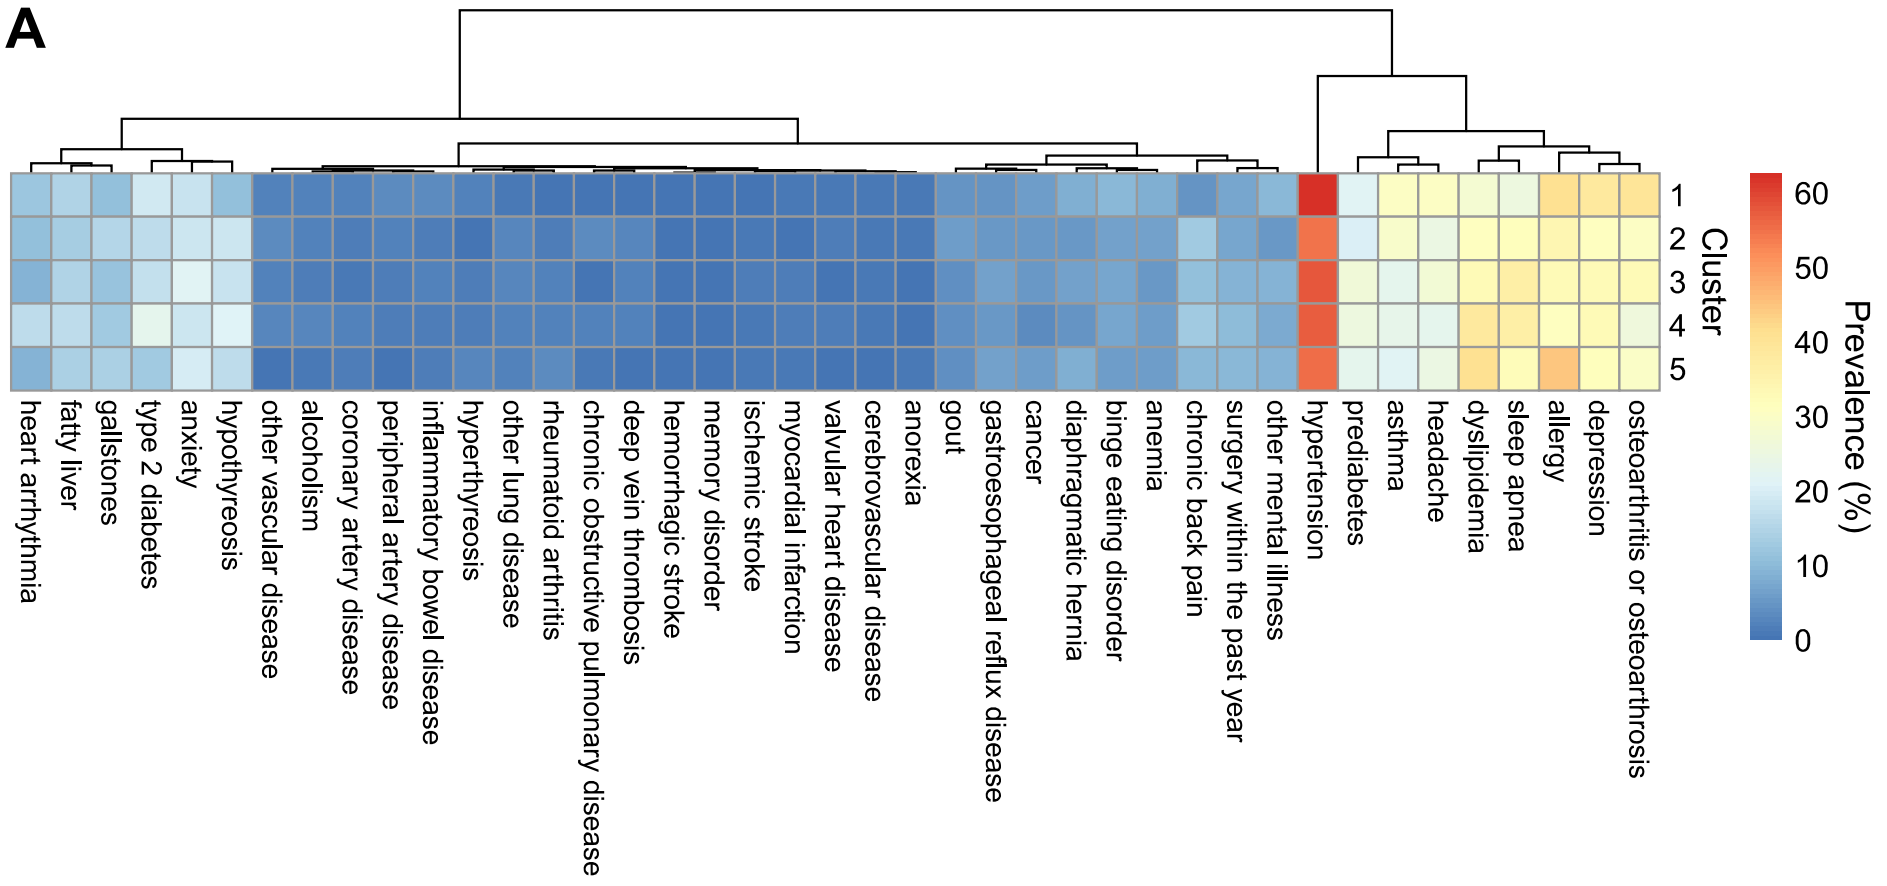

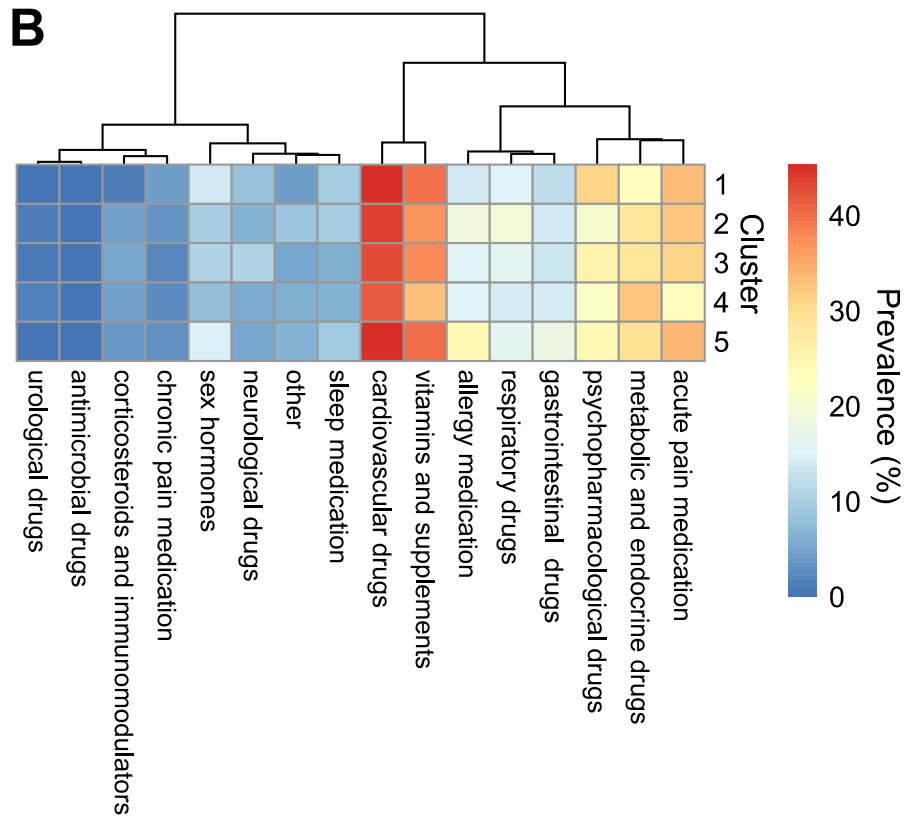

Individual weight loss patterns were clustered based on dynamic time-warping distance and agglomerative hierarchical clustering. We identified five clusters based on weight loss success. Cluster 1, super-responders; cluster 2, responders; cluster 3, moderate responders; cluster 4, non-responders; cluster 5, gainers.

**Figure S3.** Flow of patients in the 12-month program; patients still active, those having dropped out, and those having completed the program.

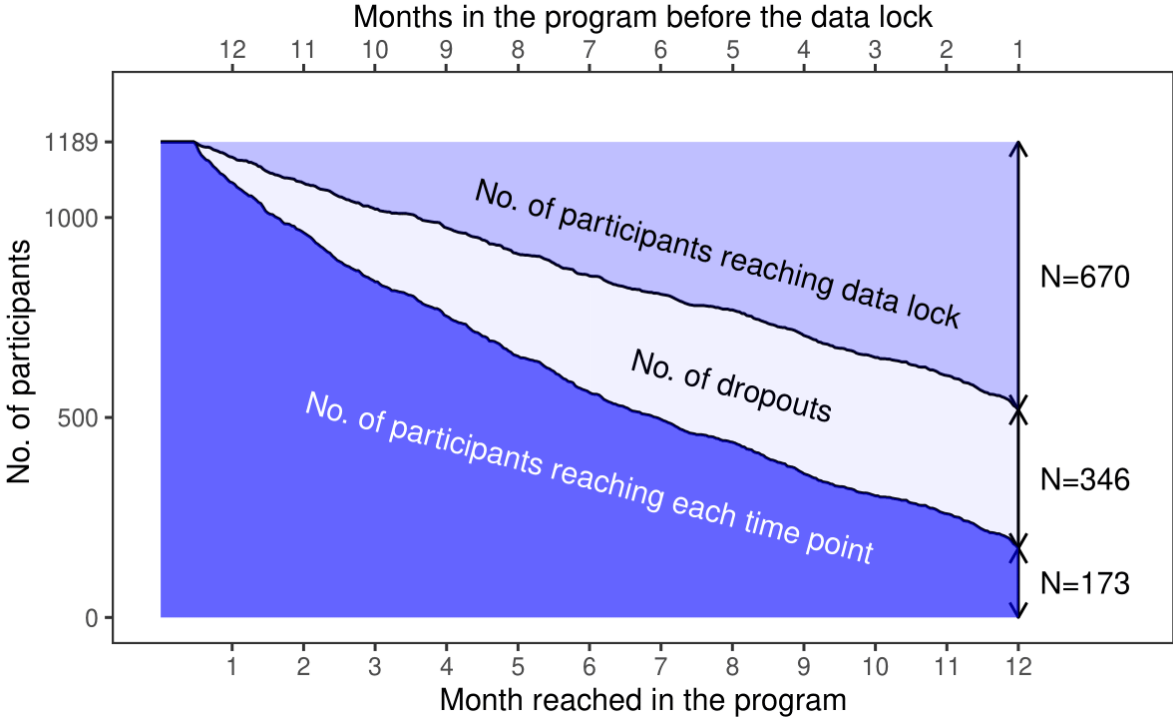

**Figure S4.** Proportion of dropouts in different weight loss success clusters.

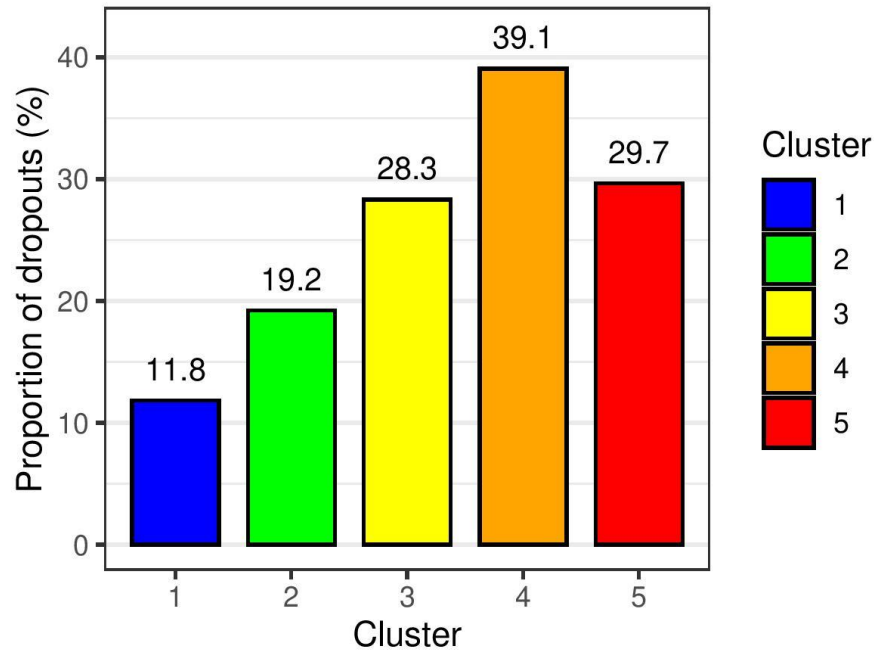

Individual weight loss patterns were clustered based on dynamic time-warping distance and agglomerative hierarchical clustering. We identified five clusters based on weight loss success: cluster 1, superresponders; cluster 2, responders; cluster 3, moderate responders; cluster 4, nonresponders; cluster 5, gainers. Participants inactive for >90 days were considered as dropouts from the program.
